# Supplementary material for: Unearth the understanding of interfacial engineering techniques on nano sulfur cathodes for steady Li–S cell systems
Source: Royal Society of Chemistry journal article supplement (doi:10.1039/d0ta04592f), 2020-01-01
Supplement: d0ta04592f1.pdf [file d0ta04592f1.pdf]

## Supporting Information

### Unearth the Understanding of Interfacial Engineering Techniques on Nano Sulfur Cathodes for Steady Li-S Cell Systems

Ting Meng,<sup>a</sup> Jiechang Gao,<sup>a</sup> Jianhui Zhu,<sup>b</sup> Ning Li,<sup>a</sup> Maowen Xu,<sup>a</sup> Chang Ming Li,<sup>a</sup> Jian Jiang<sup>a\*</sup>

<sup>a</sup>School of Materials and Energy, and Chongqing Key Lab for Advanced Materials and Clean Energies of Technologies Southwest University, No.2 Tiansheng Road, BeiBei District, Chongqing 400715, P.R. China.

<sup>b</sup>School of Physical Science and Technology, Southwest University, No.2 Tiansheng Road, BeiBei District, Chongqing 400715, P.R. China.

To whom correspondence should be addressed: Tel: +86-23-68254842.

\*E-mail: [ecmli@swu.edu.cn](mailto:ecmli@swu.edu.cn) (C.M. Li); [jjiang@swu.edu.cn](mailto:jjiang@swu.edu.cn) (J. Jiang).

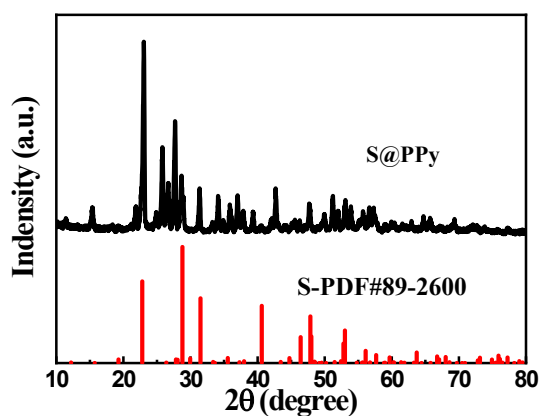

Fig. S1: XRD pattern of S@PPy specimen.

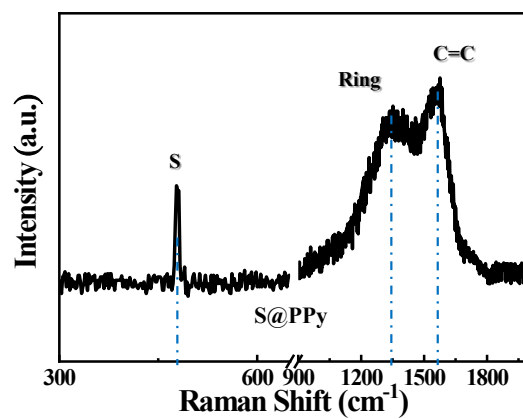

Fig. S2: The Raman spectroscopy of S@PPy.

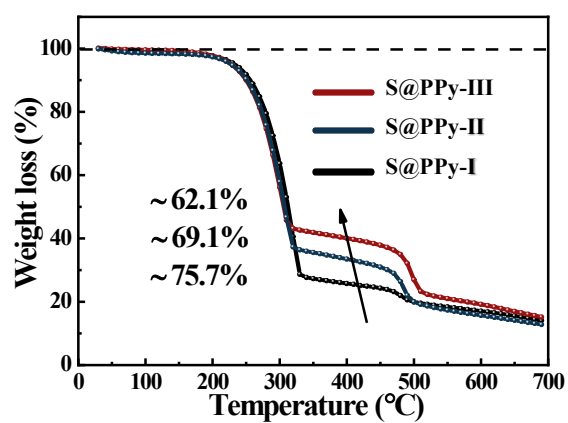

Fig. S3: The TG testing of S@PPy-I, S@PPy-II and S@PPy-III samples.

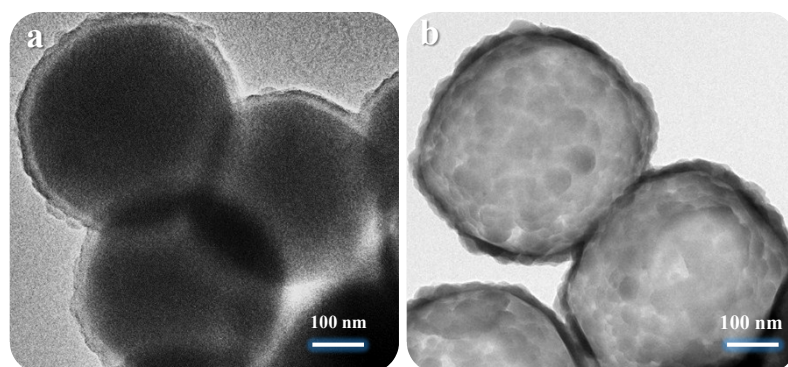

**Fig. S4:** TEM images of S@PPy-I (a) before and (b) after immersion in  $(\text{NH}_4)_2\text{S}_2\text{O}_8$ -involved solution.

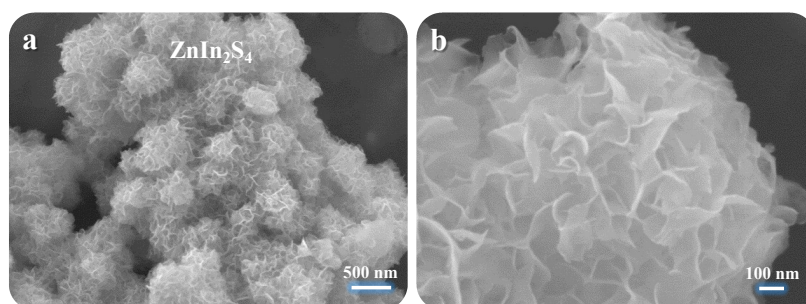

**Fig. S5:** SEM images of pure  $\text{ZnIn}_2\text{S}_4$  nanoparticles.

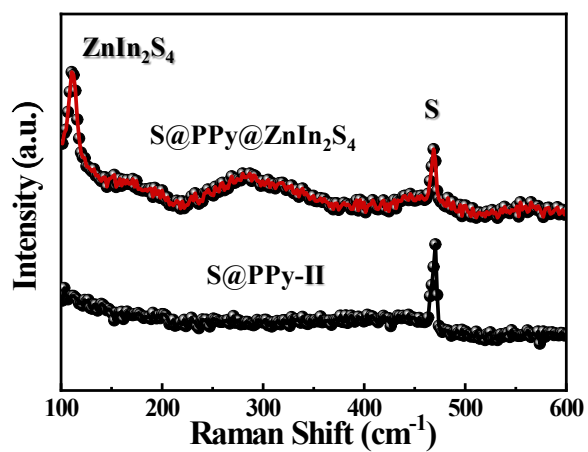

Fig. S6: Raman spectra of S@PPy-II and S@PPy@ZnIn<sub>2</sub>S<sub>4</sub> samples.

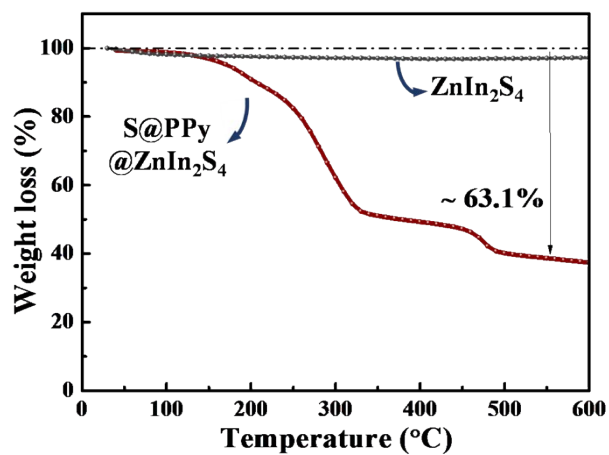

Fig. S7: The TG testing record of S@PPy@ZnIn<sub>2</sub>S<sub>4</sub>.

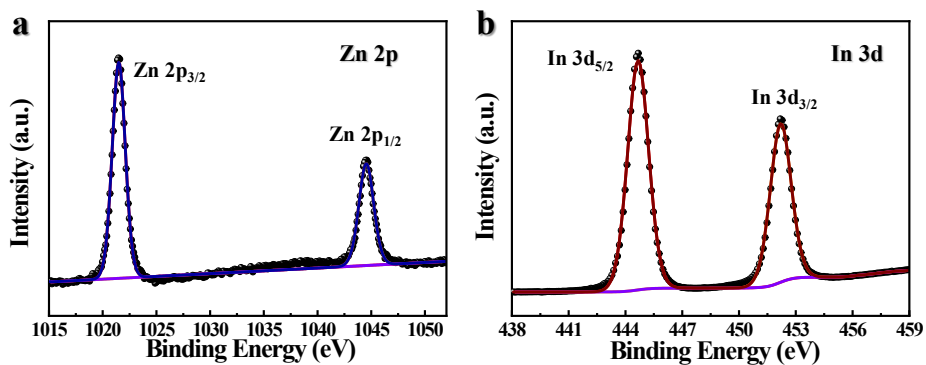

Fig. S8: (a) Zn 2p and (b) In 3d XPS spectra of S@PPy@ZnIn<sub>2</sub>S<sub>4</sub>.

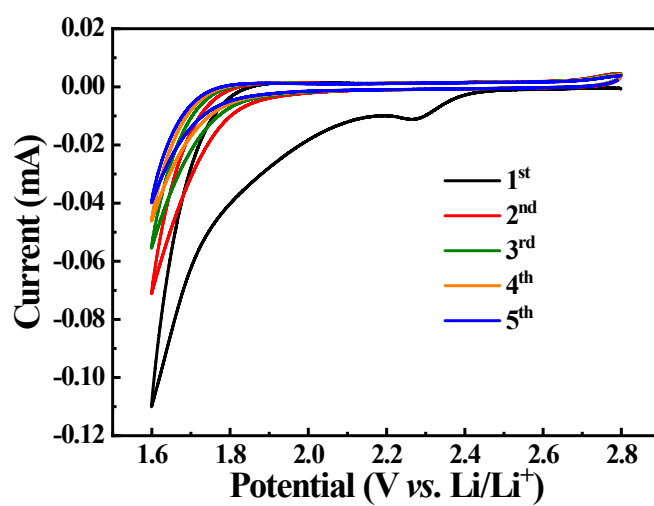

Fig. S9: The CV curve of single-phased ZnIn<sub>2</sub>S<sub>4</sub>.

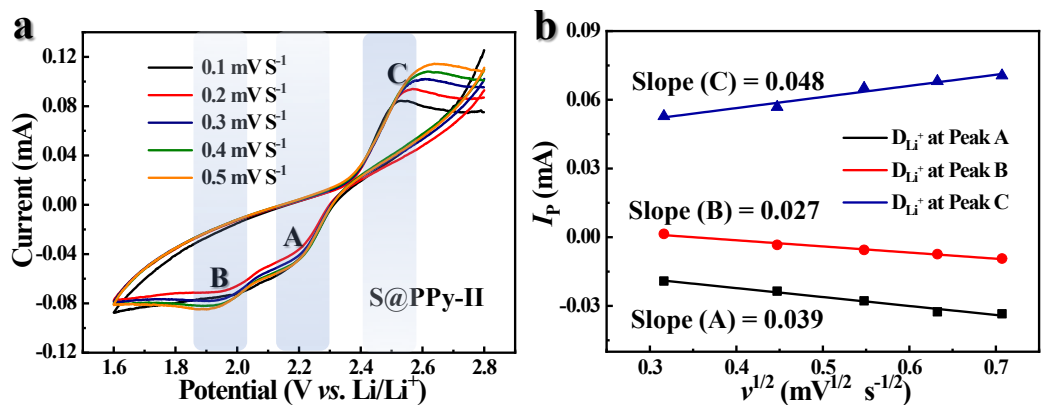

**Fig. S10:** (a) CV curves at various scan rates and (b) corresponding linear fitting toward peak currents of S@PPy-II cathodes.

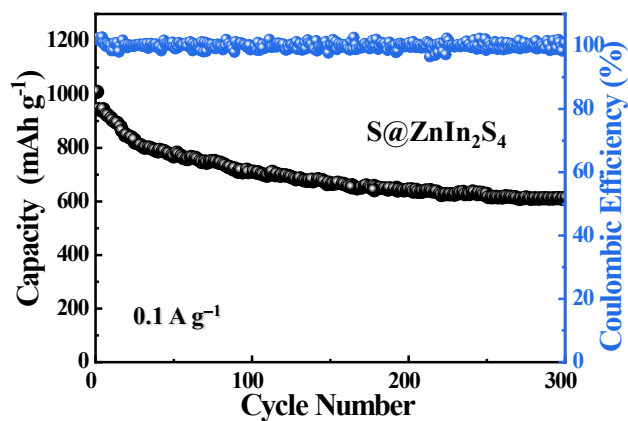

**Fig. S11:** The long-term cyclic record of S@ZnIn<sub>2</sub>S<sub>4</sub> cathode.

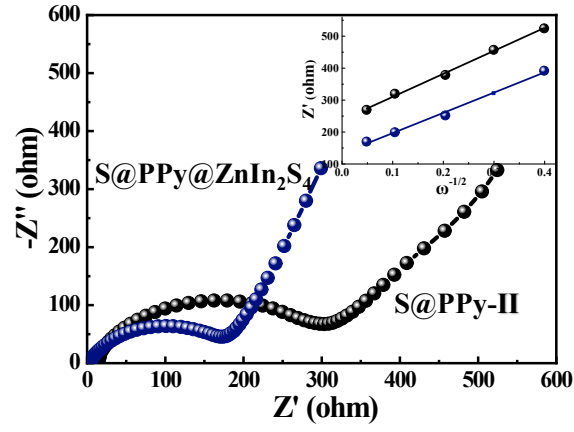

**Fig. S12:** EIS plots of S@PPy@ZnIn<sub>2</sub>S<sub>4</sub> (inset: the relationship between Z' and ω<sup>-1/2</sup>).

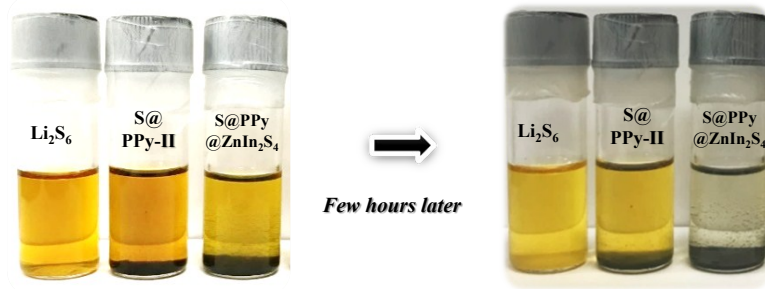

**Fig. S13:** The adsorption ability of S@PPy-II and S@PPy@ZnIn<sub>2</sub>S<sub>4</sub> in a Li<sub>2</sub>S<sub>6</sub> solution.

**Table S1.** The electrochemical performances comparison of the studies with PPy-S hybrid electrodes. <sup>1-9</sup>

| Cathode material                       | Sulfur content | Initial discharge capacity (mAh g <sup>-1</sup> ) | Reversible discharge capacity (mAh g <sup>-1</sup> ) | Current rate           | Total cycle number | Ref |
|----------------------------------------|----------------|---------------------------------------------------|------------------------------------------------------|------------------------|--------------------|-----|
| Core-shell S@PPy                       | 32.0%          | 163                                               | 138                                                  | 100 mA g <sup>-1</sup> | 100                | 1   |
| MWCNTs@S/NPC@PEG                       | 56.7%          | 1078                                              | 791                                                  | 0.5C                   | 50                 | 2   |
| PPy/TiO <sub>2</sub> @S                | 64.7%          | 997.1                                             | 1150                                                 | 0.1C                   | 100                | 3   |
| PPy@S@PPy                              | 65.6%          | 801                                               | 554                                                  | 50 mA g <sup>-1</sup>  | 50                 | 4   |
| S@PPy/GS                               | 49.0%          | 908.7                                             | 537.8                                                | 0.2C                   | 200                | 5   |
| S@PHNS                                 | 65.0%          | 1074.2                                            | 781.5                                                | 0.5 C                  | 100                | 6   |
| Nano-S/PPy/GNS                         | 52.0%          | 1415.7                                            | 641.5                                                | 0.1 C                  | 40                 | 7   |
| PPy@CMK-8/S                            | 57.2%          | 1099                                              | 880                                                  | 0.2C                   | 100                | 8   |
| GCS@PPy                                | 64.0%          | 830                                               | 740                                                  | 0.5C                   | 50                 | 9   |
| S@PPy@ZnIn <sub>2</sub> S <sub>4</sub> | 63.1%          | 1200                                              | 891                                                  | 100 mA g <sup>-1</sup> | 500                |     |

## References:

1. J. Shao, X. Li, L. Zhang, Q. Qu and H. Zheng, *Nanoscale*, 2013, **5**, 1460-1464.
2. Z. Li, L. Yuan, Z. Yi, Y. Liu, Y. Xin, Z. Zhang and Y. Huang, *Nanoscale*, 2014, **6**, 1653-1660.
3. Y. Zhao, W. Zhu, G. Z. Chen and E. J. Cairns, *J. Power Sources*, 2016, **327**, 447-456.
4. X. Liang, M. Zhang, M. R. Kaiser, X. Gao, K. Konstantinov, R. Tandiono, Z. Wang, H.-K. Liu, S.-X. Dou and J. Wang, *Nano Energy*, 2015, **11**, 587-599.
5. X. Zhou, F. Chen and J. Yang, *J. Energy Chem.*, 2015, **24**, 448-455.
6. Y. Liu, W. Yan, X. An, X. Du, Z. Wang, H. Fan, S. Liu, X. Hao and G. Guan, *Electrochim. Acta*, 2018, **271**, 67-76.
7. Y. Zhang, Y. Zhao, A. Konarov, D. Gosselink, H. G. Soboleski and P. Chen, *J. Power Sources*, 2013, **241**, 517-521.
8. G. Ma, Z. Wen, J. Jin, Y. Lu, K. Rui, X. Wu, M. Wu and J. Zhang, *J. Power Sources*, 2014, **254**, 353-359.
9. Y. Dong, S. Liu, Z. Wang, Y. Liu, Z. Zhao and J. Qiu, *Nanoscale*, 2015, **7**, 7569-7573.
